# Supplementary material for: Modulating interfacial charge distribution and compatibility boosts high energy density and discharge efficiency of polymer nanocomposites
Source: Royal Society of Chemistry journal article supplement (doi:10.1039/c9ra06933j), 2019-01-01
Supplement: c9ra06933j1.pdf [file c9ra06933j1.pdf]

*Supporting Information*

**Modulating Interfacial Charge Distribution and Compatibility  
Boosts High Energy Density and Discharge Efficiency of Polymer  
Nanocomposites**

Tao Zhang,<sup>a</sup> Mengfan Guo,<sup>a</sup> Jianyong Jiang,<sup>a</sup> Xueyou Zhang,<sup>a</sup> Yuanhua Lin,<sup>a</sup> Ce-Wen Nan,<sup>a</sup> Yang Shen<sup>\*a</sup>

<sup>a</sup> School of Materials Science and Engineering, and State Key Lab of New Ceramics and Fine Processing, Tsinghua University, Beijing 100084, China. E-mail: [shyang\\_mse@tsinghua.edu.cn](mailto:shyang_mse@tsinghua.edu.cn)

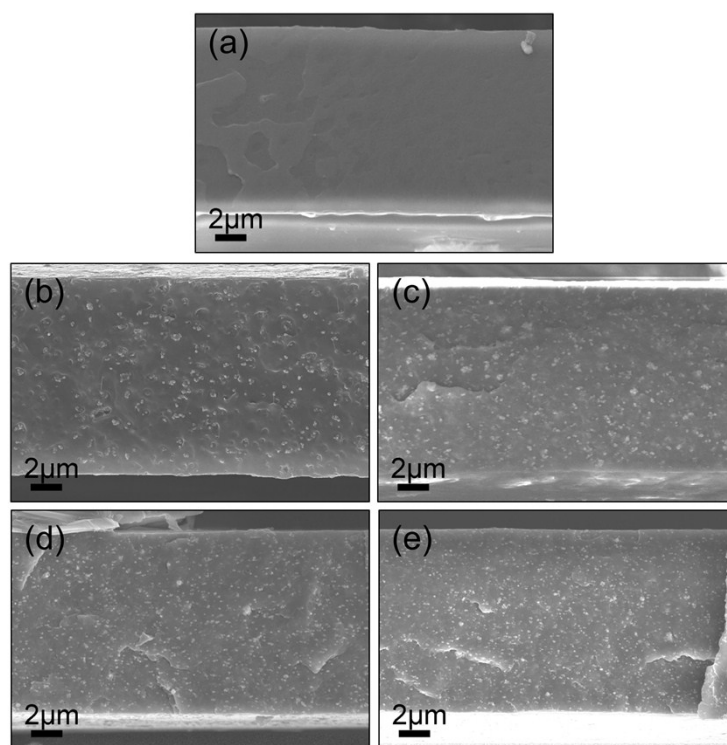

Figure S1. Cross-sectional SEM images of the P(VDF-HFP)-based nanocomposite films: (a) Pure P(VDF-HFP), (b) BTO/P(VDF-HFP), (c) BTO@PTFEMA/P(VDF-HF), (d) BTO@PHFBMA/P(VDF-HF), (e) BTO@PDFHMA/P(VDF-HF).

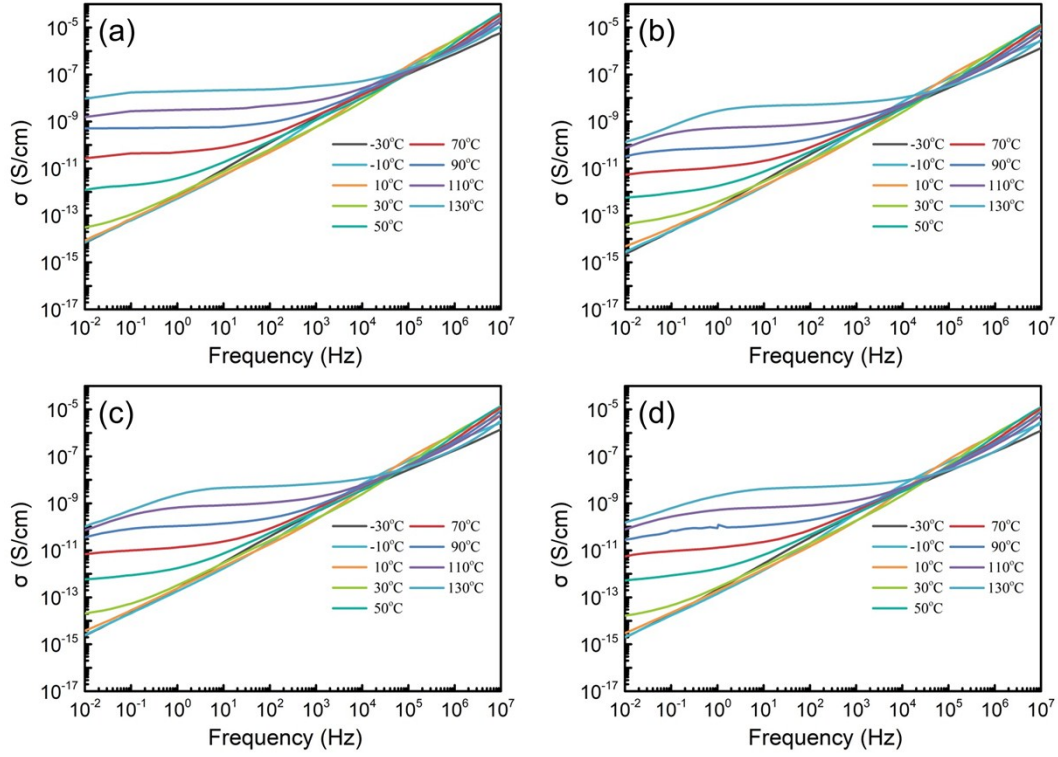

Figure S2. Frequency dependence of the conductivity ranging from -30 to 130 °C for P(VDF-HFP)-based nanocomposite films: (a) BTO/P(VDF-HFP), (b) BTO@PTFEMA/P(VDF-HF), (c) BTO@PHFBMA/P(VDF-HF), (d) BTO@PDFHMA/P(VDF-HF).

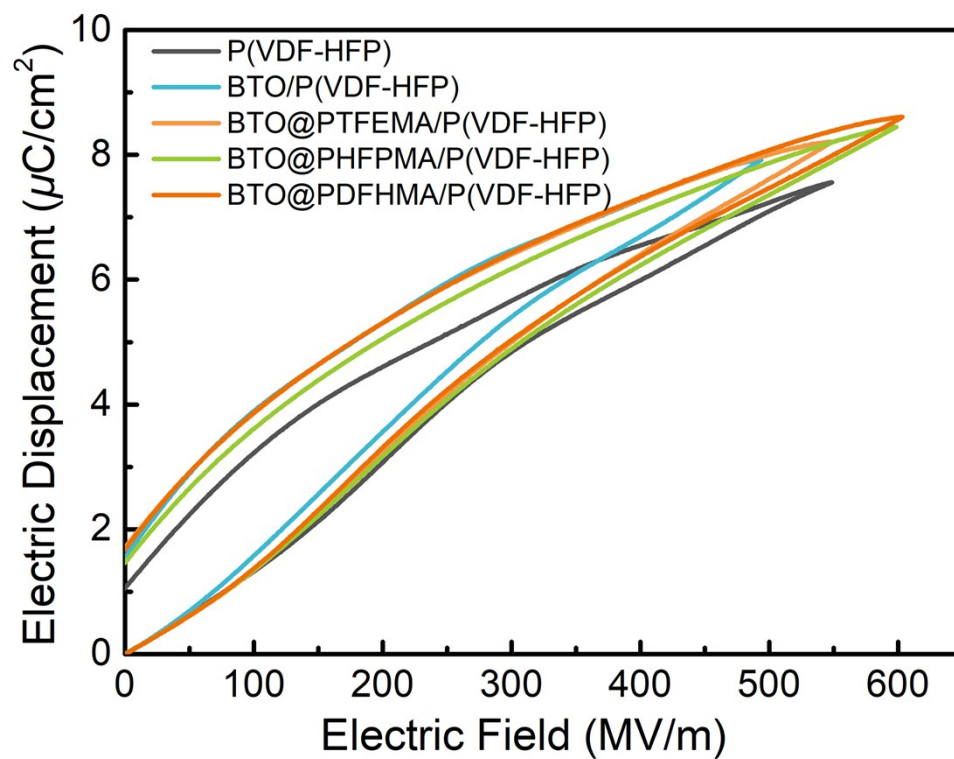

Figure S3. Unipolar electric displacement-electric field ( $D-E$ ) loops for P(VDF-HFP)-based nanocomposite films.
